# Supplementary material for: Tau underlies synaptic and cognitive deficits for type 1, but not type 2 diabetes mouse models
Source: PubMed Central journal article supplement (PMC6516168; doi:10.1111/acel.12919), 2019-02-27
Supplement: ACEL-18-e12919-s001.pdf [file ACEL-18-e12919-s001.pdf]

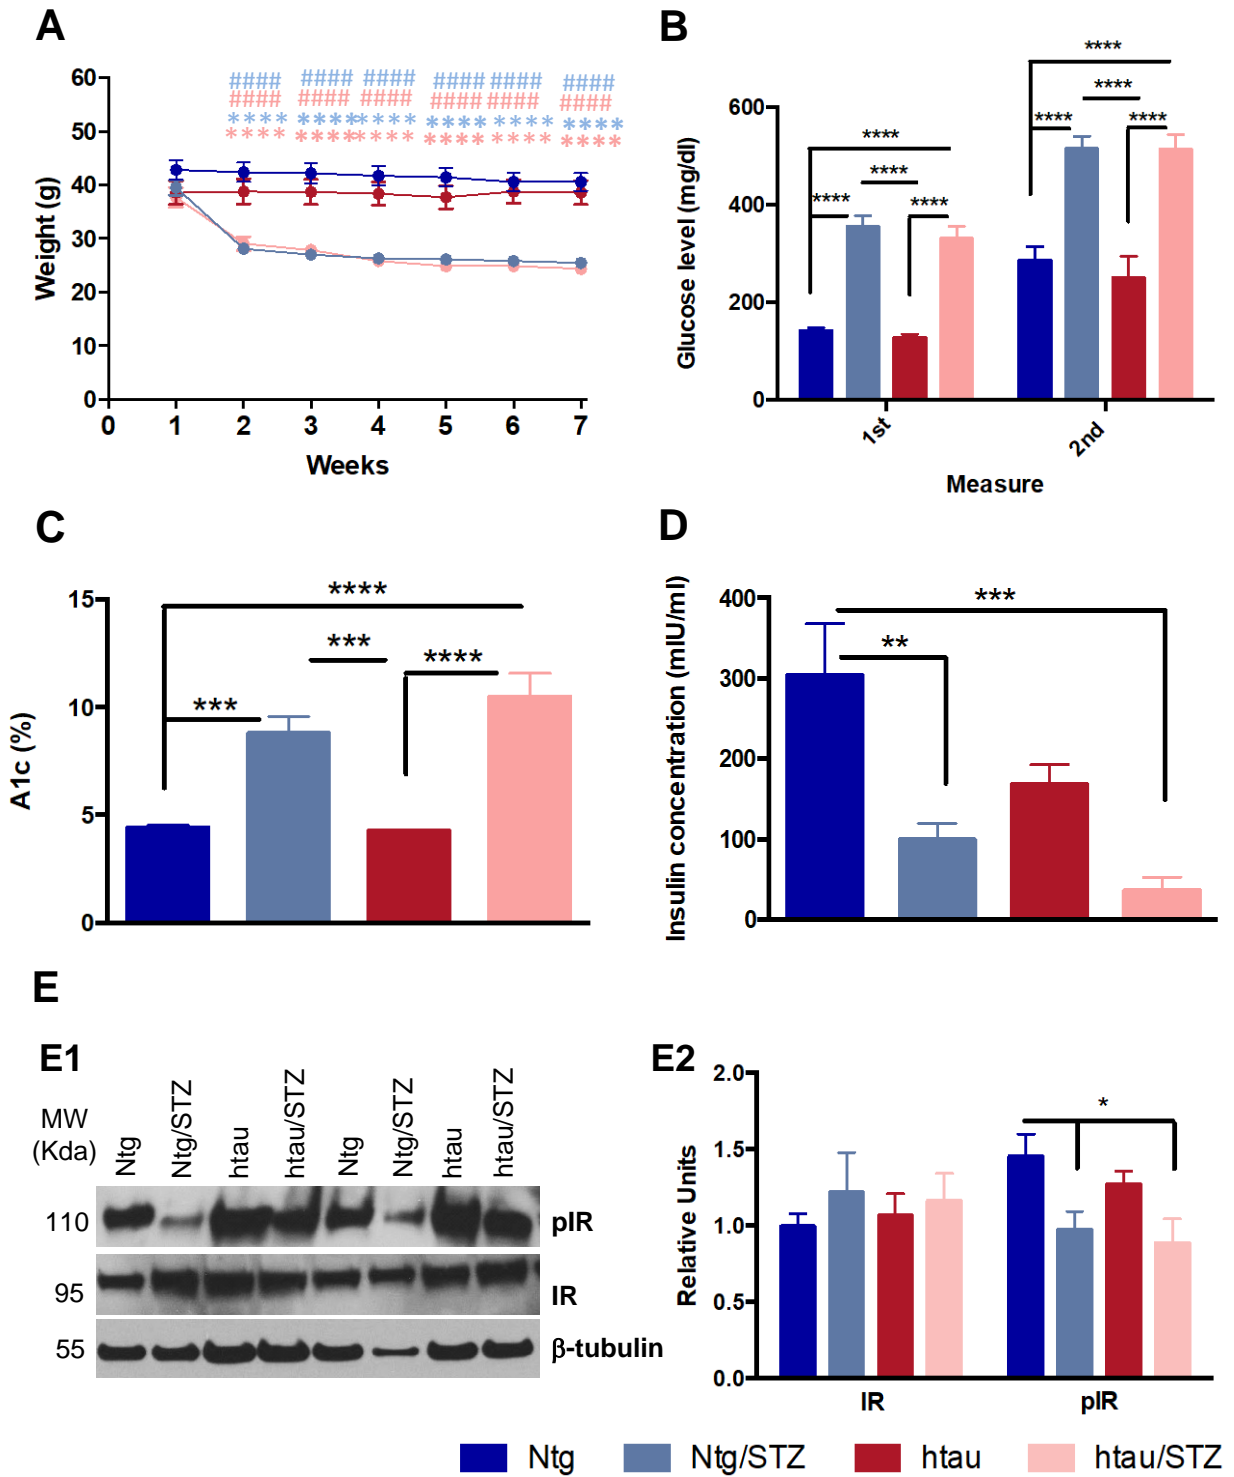

**Figure S1**

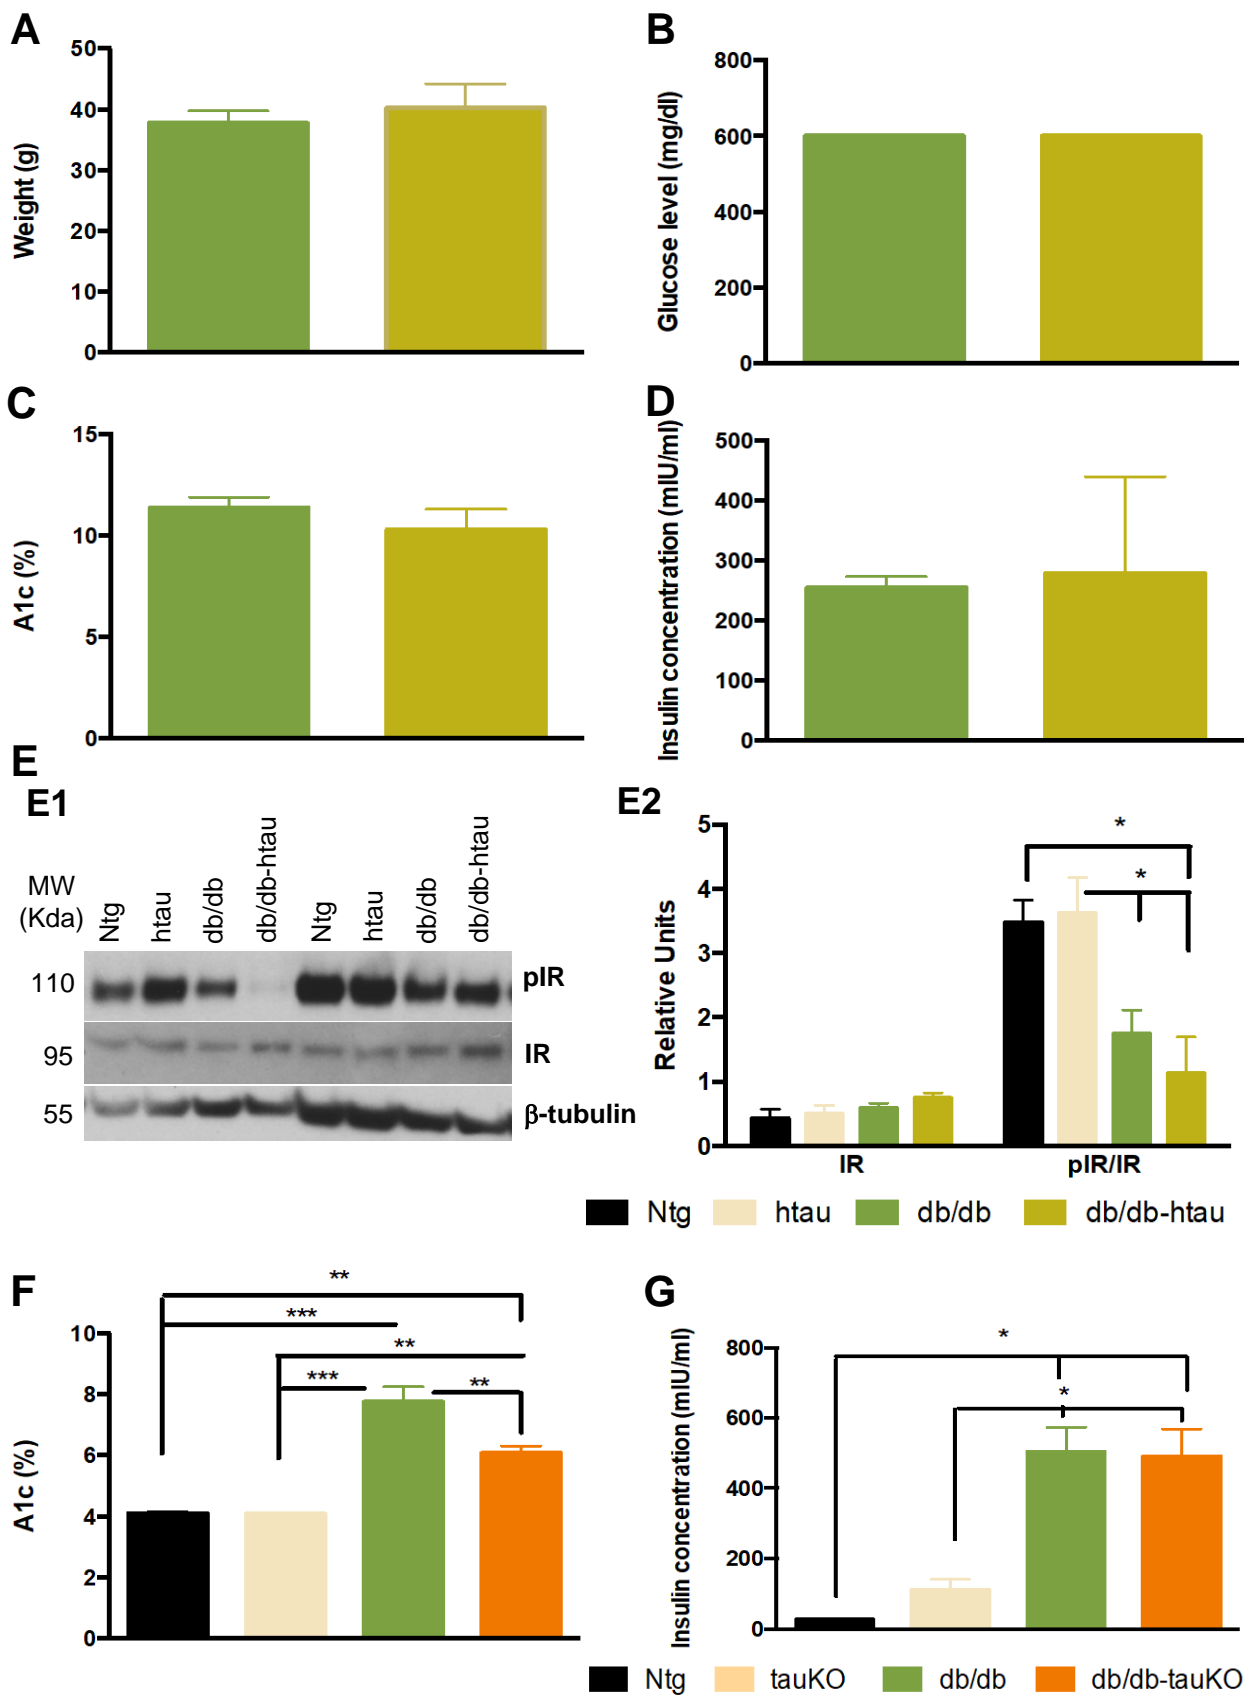

**Figure S2**

**A**

**A1**

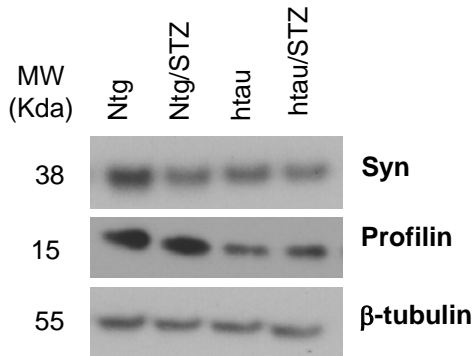

**A2**

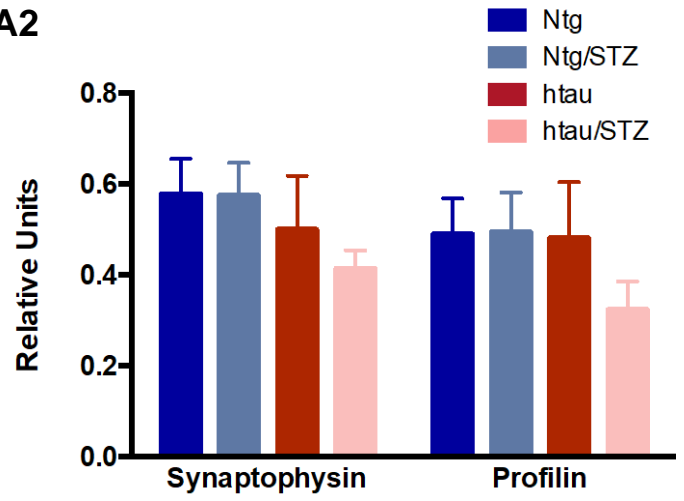

**Figure S3**

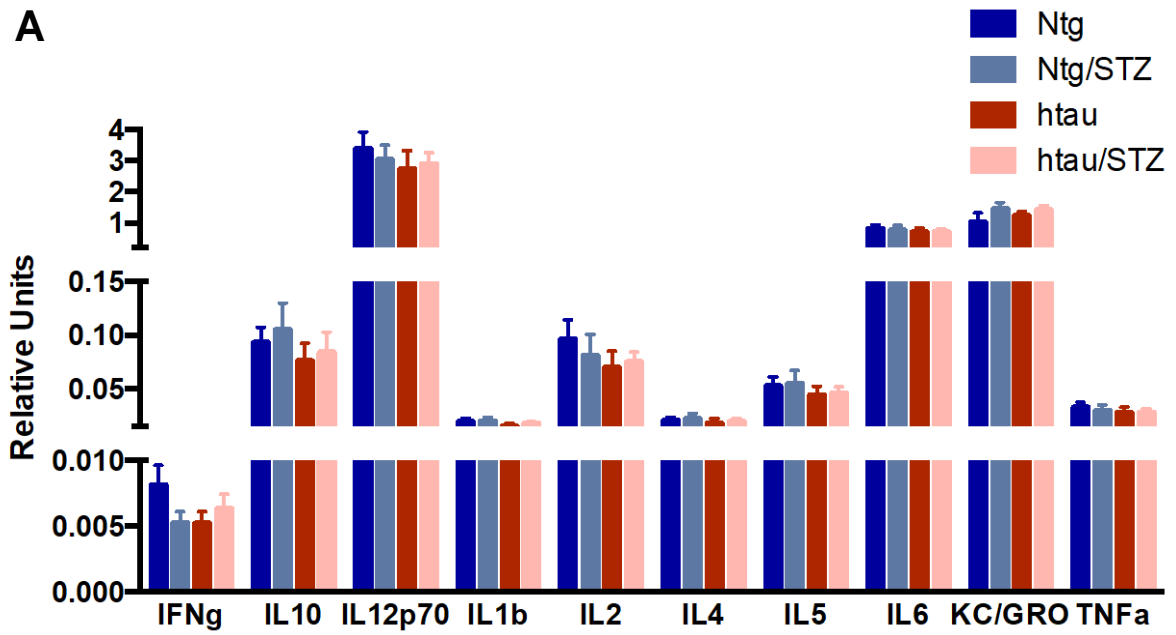

**Figure S4**

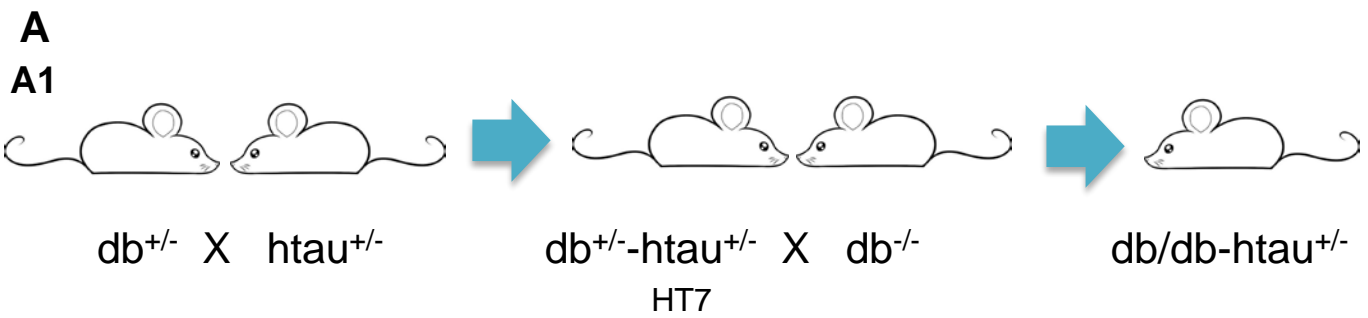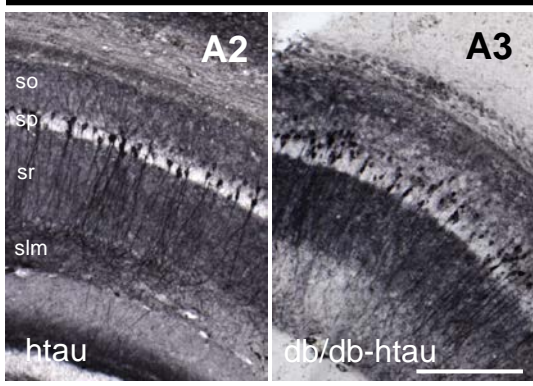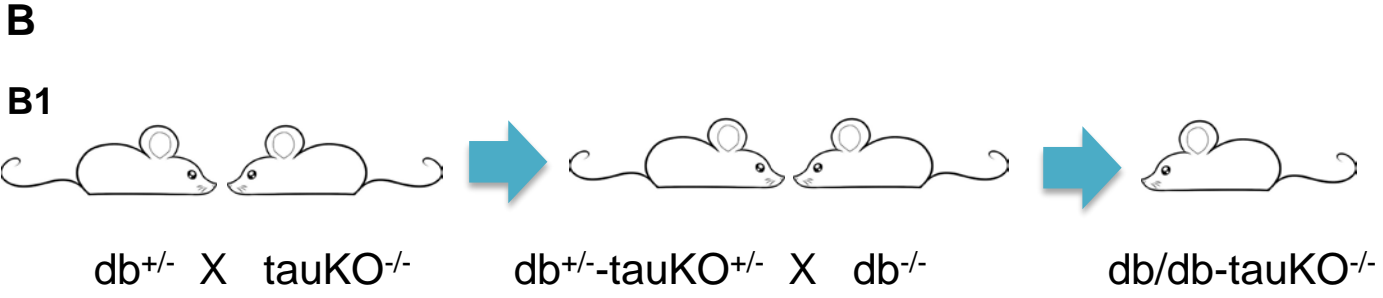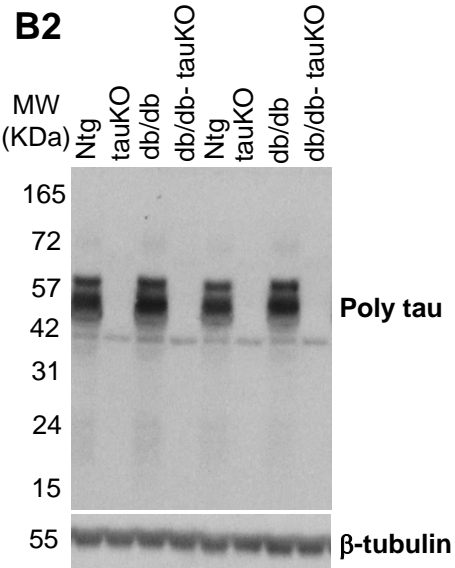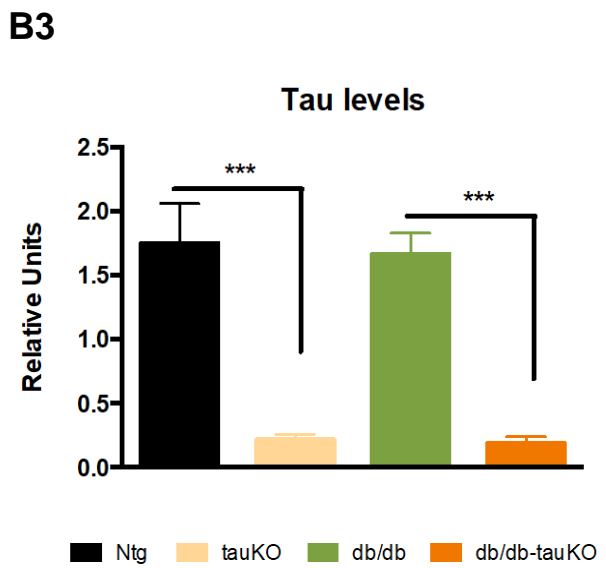

**Figure S5**

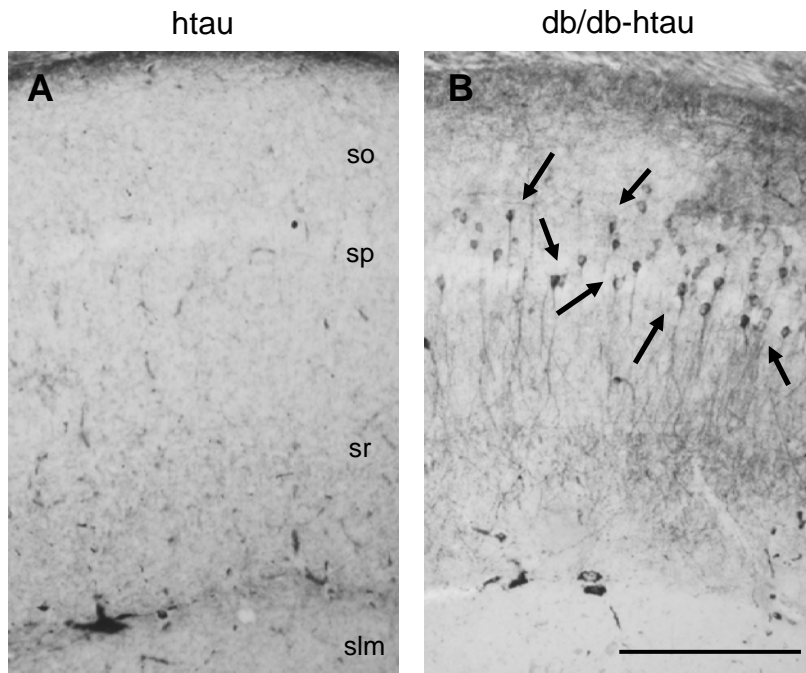

**Figure S6**

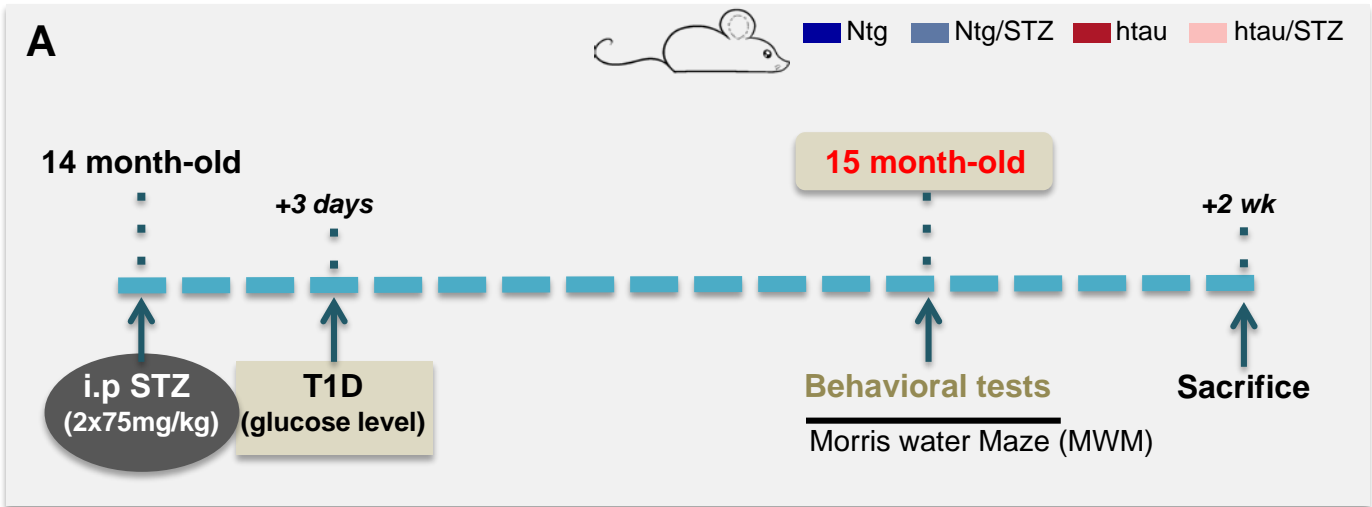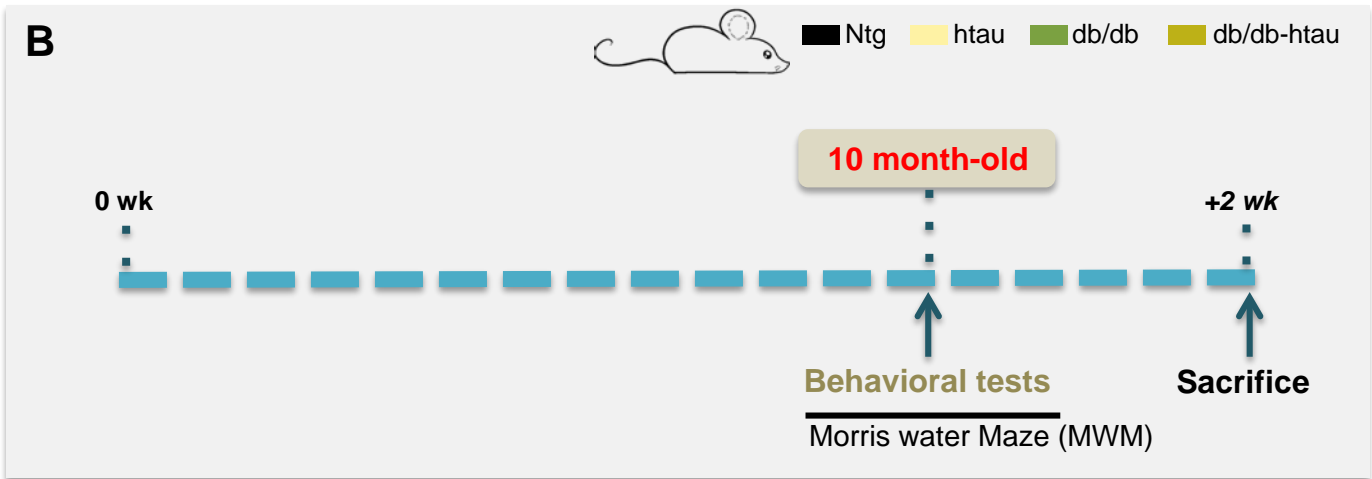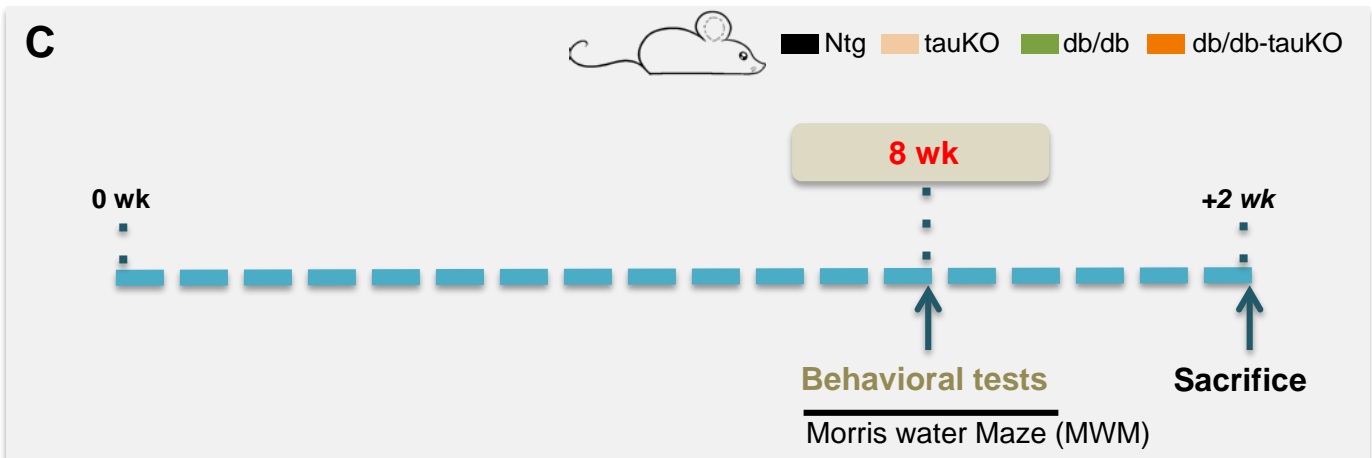

**Figure S7**

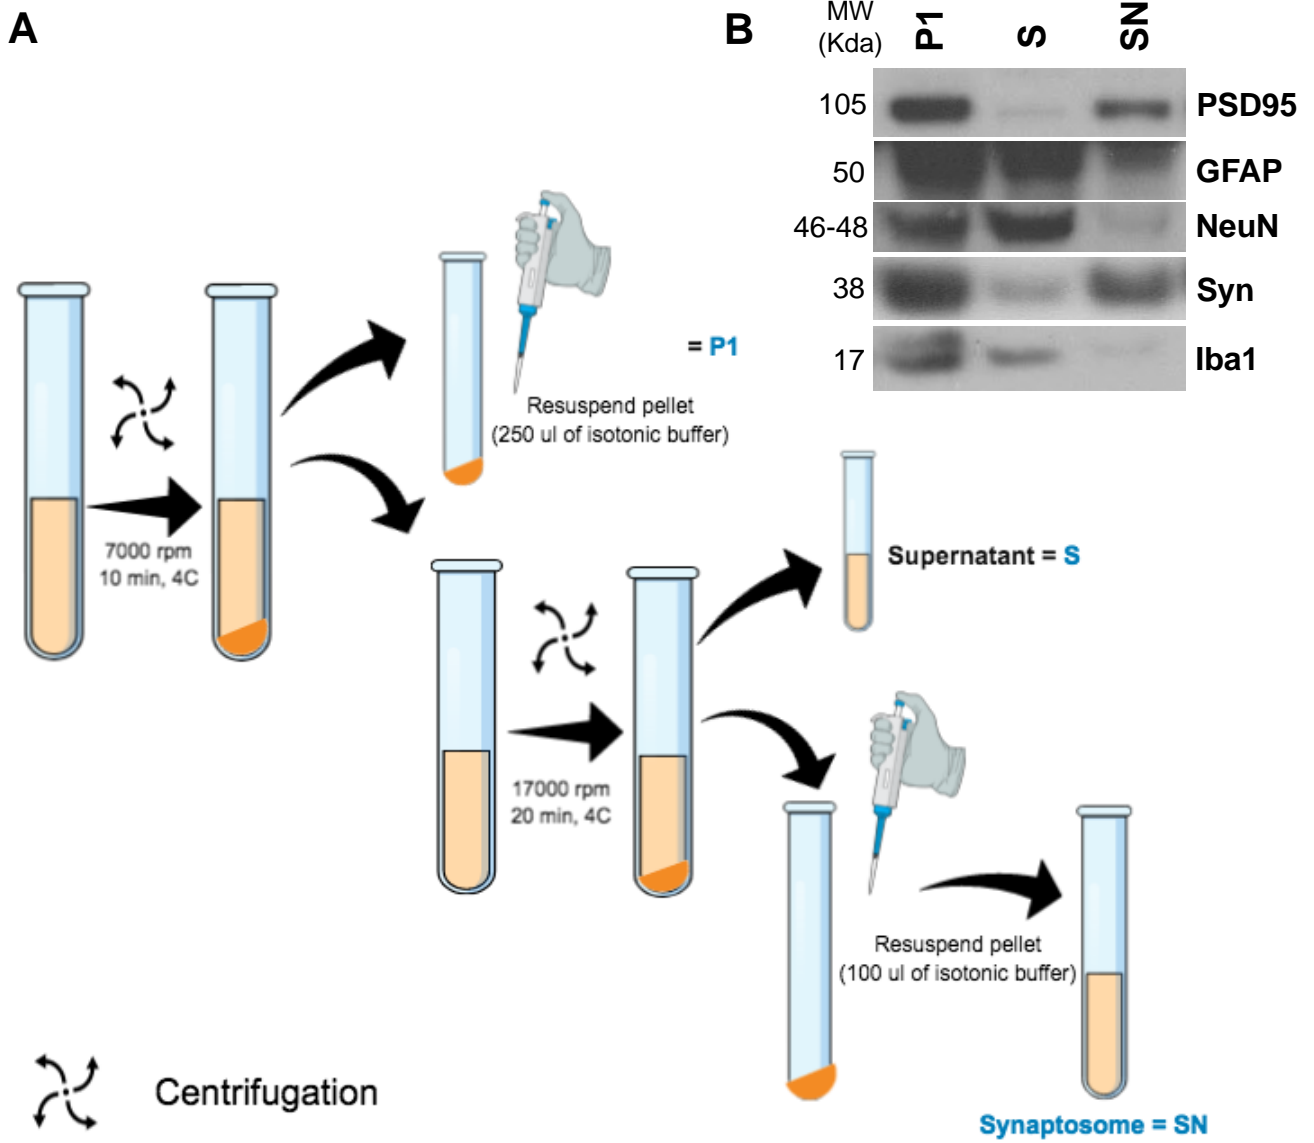

**Figure S8**
